# Supplementary material for: Identification and Functional Characterization of Peptides With Antimicrobial Activity From the Syphilis Spirochete, Treponema pallidum
Source: Front Microbiol. 2022 May 3;13:888525. doi: 10.3389/fmicb.2022.888525 (PMC9200625; doi:10.3389/fmicb.2022.888525)
Supplement: Supplementary file 3 [file Table_3.XLSX]

## Sheet: Ranked by no. positive hits
		Ranking (+ve hits out of 9)	Ranking (+ve hits out of 8;no ADAM)	ADAM (SVM)	iAMPpred (SVM)			CAMP (SVM)		CAMP (RFC)		CAMP (ANN)	CAMP (DAC)		AmpScanner V2
	T. pallidum protein (≤150 AA)				antibacterial	antiviral	antifungal	Class	AMP Probability	Class	AMP Probability	Class	Class	AMP Probability	SeqID	Prediction_Class	Prediction_Probability	Sequence
1	WP_010881454.1	6	6		0.706	0.91	0.624	AMP	1	AMP	0.9915	NAMP	AMP	1	WP_010881454.1	Non-AMP	0.0066	MNNGVNKLSDLLVLTTEYIQASYETEAFDAHREWVCIVGNPVALHSTLVDIRNGKVVVKVTHPGWAQYLLLKKDEIVHALRRRYPSLGVTGMSTYVDSTSRTPSAKKDMQGLSVSEKQTRPVPELAEVFEQLRTLFQVKTEEPSH
2	WP_010881470.1	1	1		0.021	0.17	0.017	NAMP	0.15	AMP	0.9235	NAMP	NAMP	0.063	WP_010881470.1	Non-AMP	0.0011	MDDARYAEWSASLVQLPDTHFFDLMRLYLGVLKTPFHKQRLVQQLSAFLQRKSIQNAVVQMLDELDLLFISVVMCVPRATLELLTIFF
3	WP_010881480.1	7	7		0.34	0.74	0.562	AMP	1	AMP	0.7175	AMP	AMP	0.993	WP_010881480.1	AMP	1	MDLGQRVVRVIPLAPLPVRVYNAGGLRVDFFPRFFGRSPQGVGVGFARLKLSASVGSNGFRLTRAVWIFWLCFLVSGLSRAFLVYFLSVIRI
4	WP_010881508.1	3	3		0.586	0.49	0.705	NAMP	0.283	NAMP	0.2045	NAMP	NAMP	0.263	WP_010881508.1	AMP	0.9998	MRKYLSARSMCCSFFSCAKNCATLGLDSTEGRQFLAVGPQPFASLEGFHGEGGDCLFTTFPPLSIPRRRFCAGHA
5	WP_010881515.1	3	3		0.109	0.38	0.244	AMP	1	AMP	0.964	NAMP	AMP	1	WP_010881515.1	Non-AMP	0.4847	MQRVLESDTPYFVKGIQRPVSTLSDRDRALLNRRGNAYLNEGKLQEAARVFITTGYHDGLTRIGDVYMRKADVLTALRFYYFARNEQKMRPIVSALSVLIRCLI
6	WP_010881519.1	4	4		0.131	0.45	0.116	AMP	1	AMP	0.797	NAMP	AMP	1	WP_010881519.1	AMP	0.9999	MLPFYFLSVATNAAIGFILTVLDSQEESAHDCPFLYDATFSLVLALLSGIAAVCKCVNPIGAQLPVLGDLIPTLAGGTGCALFLHRYCVALSKPSPIPRTLVQYAKPLGLFSLAASILHLLFAPTLFL
7	WP_010881533.1	0	0		0.064	0.16	0.026	NAMP	0.119	NAMP	0.377	NAMP	NAMP	0.181	WP_010881533.1	Non-AMP	0.0003	MVVNAVVGADEASARLREYCSGLPDVEKKIAESTSPEGAKLVSDFGIGSVPMVVILDEDSSELFRTADIGELEKFFS
8	WP_010881577.1	5	5		0.105	0.31	0.106	AMP	1	AMP	0.883	AMP	AMP	1	WP_010881577.1	AMP	0.996	MEFLRATASREVDVNSGWGYGSGVERGFLCEGDVRACLVPASHFVRAGTAPGTTPGTAAACLFVPPYVLGVTPAGTLPFGLPSQSVLGGLRLAPVHASSLLEGLGATIFFRCNAP
9	WP_010881579.1	8	8		0.992	0.98	0.994	AMP	1	AMP	0.948	AMP	AMP	1	WP_010881579.1	AMP	0.9966	MGRPPASKASNVFKDVFLTNAMDMQTHDCARSMGHKKNGANGDIGADCVSVETRSASQAMPWALHLKLVAPEPSGKEAHIKGQTRPASYRLGGQRQSGQGPSRNSQHVRRYEQKGHAPCCSCCSYEVEGRILLSMPARK
10	WP_010881662.1	7	7		0.963	0.88	0.984	AMP	0.926	AMP	0.643	AMP	NAMP	0.22	WP_010881662.1	AMP	0.9989	MSKAHRGKGIRGMVGRGRGVCPVTGQTGVKLLYECEIDGKKVKVSKVGRATLQNRKRRLDAQPGA
11	WP_010881670.1	5	5		0.337	0.798	0.342	AMP	1	AMP	0.978	AMP	AMP	1	WP_010881670.1	Non-AMP	0.0022	MWKRGVGALLWGMVLLRSFVAYADSQAATGGLLKEIMGEVASIRLESNMLKQQLRERHAESAALKKALQTLDVKLEKAAKALEESEHALSESKELIETLRSELEILRQRVNALNMRLRRLEITNNVLIGVAVVCGVAAIGAGIYAAVK
12	WP_010881766.1	8	7	2.52	0.547	0.602	0.474	AMP	0.931	AMP	0.804	AMP	AMP	0.971	WP_010881766.1	AMP	1	MRKIRGHSVTQGDKEVQGVVSFCVCAGGRVRGLLDRAGGGGEVAWGACGGGVCCVWWWG
13	WP_010881800.1	6	6		0.879	0.849	0.786	AMP	0.718	AMP	0.9785	NAMP	AMP	0.641	WP_010881800.1	Non-AMP	0.0025	MREKEGGVVNDDFHYEVTRNWGTLSTSGNGWSLELKSISWNGRPEKYDIRAWSPDKSKMGKGVTLTRAEIVALRDLLNSMSLDPY
14	WP_010881803.1	7	7		0.991	0.959	0.983	AMP	1	AMP	0.8555	NAMP	AMP	1	WP_010881803.1	AMP	0.9989	MQGSVQIQKGNISSSYTPEKHPSHPTSANGSMSPKRICELRKEDPSSLHKQLLKNSLEKGTEHCDRTTKTYGQIFQLFCLCCAGAAPFYRARAFRLQSTFLIYTLHCSSDSVSTSTHYFRRLYSRRW
15	WP_010881816.1	3	3		0.045	0.273	0.039	AMP	1	AMP	0.9855	NAMP	AMP	0.999	WP_010881816.1	Non-AMP	0.0039	MRLRGVAGALLGAVVLVALGLMGVWWVFYPKKGDRGAAVAREPVLLHIDPAQMEAADEPLTLPPIERSRERMSAWSEQECLRQLEYPTEKAVQALEHANEKRIQQMLEAVP
16	WP_010881899.1	0	0		0.063	0.152	0.092	NAMP	0.007	NAMP	0.002	NAMP	NAMP	0.001	WP_010881899.1	Non-AMP	0.0706	MLSMQLVTVTVQGAMVADIAVAVRTAPHPFLYASVLQDSPQARKPVRETRYQKMSAFLCT
17	WP_010881916.1	7	7		0.516	0.719	0.852	AMP	0.977	AMP	0.9535	AMP	AMP	0.934	WP_010881916.1	Non-AMP	0.029	MNSYFSALPLKCVRRPFILSRNEGWGIKRFYVADEPHRSFLCMQEGVRRGGGESEITQRKADVLRKSIRSADRYKEDRSCRT
18	WP_010881939.1	1	0	0.75	0.062	0.078	0.047	NAMP	0.418	NAMP	0.103	NAMP	NAMP	0.016	WP_010881939.1	Non-AMP	0.0018	MSEEERMYSFSGEEIKELALLFRRCGQTLAPALRRLALFVDRTVCRHMTVEEAEDFFGSAER
19	WP_010882063.1	6	6		0.326	0.619	0.401	AMP	0.966	AMP	0.9535	AMP	AMP	0.944	WP_010882063.1	AMP	0.9989	MCSFEHGGWYVPKTVLSLLRRRKCQDARAESEELGITGICQNYAVPVQLGVQHYFGAHWGIDATATVSFGVDTKLAKFRIPYTLRVGPVFRT
20	WP_010882083.1	7	7		0.506	0.813	0.24	AMP	1	AMP	0.839	AMP	AMP	1	WP_010882083.1	AMP	0.9832	MGTLRRFPASVLQIALALFLLASGARDLVHVDAGVFNAAVYFLGGLFRGHVAIGVLTLAVSLCCLTAGFFLLVDFLRPELSCVSAVLALFVVLWALNMVLVDVVGAFGRGKVLQNVSSALEHLHHTAVDLLVLGALIFVRQHTR
21	WP_010882111.1	3	3		0.23	0.37	0.264	AMP	0.964	AMP	0.979	NAMP	AMP	0.949	WP_010882111.1	Non-AMP	0.0016	MQKGSGASSVMTLYEYYLIFPDGECREISGPPCERSLLDMNGHPLRVPLSSNRVIAYRVAGKRTVAGGRGVVGIWYTLEQLDALELLEYVSGPLGQR
22	WP_010882121.1	3	3		0.022	0.08	0.049	AMP	0.982	AMP	0.985	NAMP	AMP	0.843	WP_010882121.1	Non-AMP	0.0052	MRCSHNWDDPPPLFGAVSYGMQEGAGRGVRREARDTPCRGTAEGLATSQPEDGETRAALQRIDHLDTQLLQLERDLAHYLEMAELPDPFSEN
23	WP_010882124.1	4	4		0.093	0.28	0.101	AMP	1	AMP	0.8585	NAMP	AMP	0.856	WP_010882124.1	AMP	0.9999	MNEFLSLLSRAQTILLMLRLAVTAVAVFLAIVAWTKTRTQETVCFIAGVLCMYLAQLFAFLRAAGFSITRYTPVPGVSLVGFTLELLPLACFIASLIFTIKRHSI
24	WP_010882145.1	4	4		0.349	0.69	0.17	AMP	1	AMP	0.9795	NAMP	AMP	1	WP_010882145.1	Non-AMP	0.0018	MVMAAAPLQNLCYDGLLQVTSGGNISLPVPSNQVIYAHFEHVDATPAEQGQAGVSVSELQILDALVERLIVQRRVAAEAADMAVQKRQETLLRAAELFSQKQVDETKRRGESLPYTSVEVQGPELFDLRA
25	WP_010882194.1 Tp0749	6	6		0.961	0.94	0.979	AMP	0.624	AMP	0.8435	NAMP	NAMP	0.14	WP_010882194.1	AMP	0.9995	MQDKALFSGALDTPFMQVITWARLYHKNQKRYEKIKKSFTFHETCLQSTKGIVAERILKPCVRRKVNGKFRST
26	WP_010882198.1	6	6		0.789	0.86	0.575	AMP	0.895	AMP	0.931	NAMP	NAMP	0.355	WP_010882198.1	AMP	0.886	MTYGKLIFFIIVLVGFALFMSFNVEHRCDVSLVFYTFQAVPITLSLLFAFACGALTALLFLIDPDAKTRKQKREDSPTSAPTGGVSSPEHVDVP
27	WP_010882222.1	0	0		0.248	0.36	0.234	NAMP	0.416	NAMP	0.1525	NAMP	NAMP	0.019	WP_010882222.1	Non-AMP	0.3411	MKTLQCDICRKEVDNSLPERLYWTFREYDVCEDCKESIEDKLRPIIRTHQPYSQGWYENQFMGMVQRGVSNRRP
28	WP_010882232.1	7	7		0.908	0.93	0.752	AMP	1	AMP	0.8715	NAMP	AMP	1	WP_010882232.1	AMP	0.9958	MHCPLLRHTVVIEWAAPSMVGSAPMGRDSPAGMREAVYFLHRMVVCLGVLLCAASLLYVFGNFSHFLDKSQFIILRSCVGCSVLLVVACLCAGSFELYFFLTRSDAPYGRLLCITVVALLFGMGALVFNTVVLIVAKGT
29	WP_010882310.1	8	7	0.55	0.682	0.82	0.836	AMP	0.7	AMP	0.6455	AMP	NAMP	0.132	WP_010882310.1	AMP	0.9981	MRWLCRLIGYRYGYAVCGGYRRQGGRCSAQLHAQYTRVSHCVLRIAWEVNGADYELFRLWI
30	WP_010882312.1	7	7		0.624	0.79	0.882	AMP	0.968	AMP	0.7295	AMP	NAMP	0.177	WP_010882312.1	AMP	0.9999	MRSCPKRARGVHWATGAALWCPSRMIFEKISPLQAFVWAVLRLFLKSFRTVFRGAVRAGCGVLACVRAYGFPPYGSKE
31	WP_010882317.1	4	4		0.055	0.53	0.1	AMP	0.995	AMP	0.927	NAMP	AMP	0.991	WP_010882317.1	Non-AMP	0.0006	MKFDGLIRNLDHITRKDTYLYYREEFSAVACYSLFGRIHSGRVEFSVETTPVGEKSVQVKLVDAIDYPLLPLVQALKRVVRLLIEKNQLPR
0	WP_010882347.1	1	1		0.049	0.26	0.19	NAMP	0.45	AMP	0.696	NAMP	NAMP	0.403	WP_010882347.1	Non-AMP	0.2372	MNKNTQDKGTPAALQVFLLPQYNRYSAEMTRHVPLLCNLFSMSRYVLRHLTAQIILERMSAACVCLRRRRQSEFTDPTEKIGE
33	WP_010882356.1	7	7		0.884	0.89	0.87	AMP	1	AMP	0.932	AMP	AMP	1	WP_010882356.1	Non-AMP	0.0185	MPKHNKLLGAFGEAYAARWLATRGYIIITRNWRRATGEIDIIAQQDDTIVFVEVKTLRCTSYADLAIIVGKRKQKRICETAKHFLASAREYNHMCARFDVIVLRSDPFRRQDVDIVHLPHAFEDLV
34	WP_010882357.1	8	8		0.897	0.95	0.87	AMP	1	AMP	0.961	AMP	AMP	1	WP_010882357.1	AMP	0.9868	MTDVQSSGRRRKRKRTPRRDVFSPKLEFCEYVCPRCKEVIKDLPVALGDKDSGRPVHFDCVLSFLRESECLAAHEHVVYVGQGKFAVIVFPNPASTTCFSIVRLIEWETKNTLLEWRAGVAKICSQVS
35	WP_010882403.1	6	6		0.72	0.86	0.75	AMP	1	AMP	0.991	NAMP	AMP	1	WP_010882403.1	Non-AMP	0.0185	MNVHRVLSLGMQSVPSVTLSKTGKMEGSGSFAARLSAAQQGAACSAEKNDALYTQARELETLFVRVMVQSMRETLSGQTLAGERSFSGRLYEDALYEHFSAQLAAQGGFGLAEKVYRQLNPRREAAPGA
36	WP_010882436.1	4	4		0.125	0.3	0.18	AMP	0.969	AMP	0.9635	AMP	AMP	0.996	WP_010882436.1	Non-AMP	0.0026	MKKKDAFVGTIGYDGQRAVVDRARVLKHSRSSLQELLSAGAFREAAACAVWERSTEALEAVASAYNARSGSRYSAQDIAKVFGIASEPGEKAVVL
37	WP_010882476.1	8	8		0.937	0.94	0.95	AMP	1	AMP	0.9745	AMP	AMP	1	WP_010882476.1	AMP	0.9907	MACGENERASTSPPNRAAAARGGRLTLLDGCCVALVLALTAWSGFFVYRMQGGARTLDIRCGAQRWTYPLDQERVIRVRGPLGETEIEIRAGAARVCRSPCANGTCIAHPPVQRVGEWNACLPNGVFLYVHGTDAAEPEADAVQ
38	WP_012460519.1	7	7		0.925	0.92	0.92	AMP	1	AMP	0.8375	NAMP	AMP	1	WP_012460519.1	AMP	0.9999	MLGWGMDMSKSVMLCCLLSVQPCYAGYVFVSPKLGVYGEALGGPDTVGKAVKQADGTKIAPKIWYYAPRTPLFGVDIGYQADNGLLFRVNLDAALTRLMFRSQCVVGYSLRFGWGGVRLYRFGNRV
39	WP_012460599.1	8	7	0.57	0.666	0.81	0.84	AMP	0.693	AMP	0.6615	AMP	NAMP	0.134	WP_012460599.1	AMP	0.9978	MRWLCRLIGYRYGYAVCGGYRRQGGRCSAQLHAQYTRASHCVLRIAWEVNGADYELFRLWI
40	WP_013945164.1	5	5		0.395	0.52	0.51	AMP	0.517	NAMP	0.4525	AMP	NAMP	0.445	WP_013945164.1	AMP	0.8623	MIASSSYCVWIGQDRKKNQKWEWCERAVGSVRTRTARTVLRVQKDGATKR
41	WP_013945483.1	1	1		0.096	0.45	0.599	NAMP	0.297	NAMP	0.179	NAMP	NAMP	0.02	WP_013945483.1	Non-AMP	0.0004	MKGSVFPSRGRRSSRRVFCSETIHELEKKIQDQSYIEGAIQRLALILSKRLLSMRGIECD
42	WP_013945495.1	7	7		0.961	0.94	0.947	AMP	0.998	AMP	0.9885	AMP	AMP	0.997	WP_013945495.1	Non-AMP	0.3222	MQANTQKHKISYRNTTVCRDRDGGFMQQYSIKSDPGETSHCSIVSQTEDGYIIRICRDRDGYKKVHEVHIHQSLFDLCRRTGFITAVRQNTDAVA
43	WP_013945517.1	4	4		0.411	0.54	0.441	AMP	0.991	AMP	0.986	NAMP	AMP	0.926	WP_013945517.1	Non-AMP	0.1096	MLPPMACGESWEELKYREVFEEELSALEHRRQRDPTCSVSDIEAVLETLYLMDGNNQDGRGNPRQIGLDATIAAYEQFLCEWRRQLSTASPLSMEKK
44	WP_014342225.1	7	7		0.833	0.92	0.713	AMP	0.839	AMP	0.825	AMP	NAMP	0.414	WP_014342225.1	AMP	0.9779	MLISFRKASFSHRIFTVSFLLINLISIKNVVVSHNSNCEYLDKCLCLENYQTKTAHKLVKKVYFFSKKRGIFVSKV
45	WP_014342241.1	0	0		0.039	0.31	0.076	NAMP	0.054	NAMP	0.0095	NAMP	NAMP	0.002	WP_014342241.1	Non-AMP	0.0007	MARTAASVRQENKPCQQFYFVLDEKALQSPLRENPSKNVRTIPDAGDENSSFGHARVIA
46	WP_014342244.1	3	3		0.162	0.67	0.341	NAMP	0.481	AMP	0.9565	NAMP	AMP	0.957	WP_014342244.1	Non-AMP	0.1283	MSSNAMLLTGILVSYIQWRLIKNQVLPNVLHLRKFPRGGGLSNGIGQGNLRVCSIRRDKDNQQHEQINVPLLTNPTTLTSVVHANTLHM
47	WP_014342257.1	5	5		0.83	0.69	0.855	NAMP	0.352	NAMP	0.359	AMP	NAMP	0.213	WP_014342257.1	AMP	0.9999	MSTYSLLPLQPNGADSRTLFSPLSTKTYTAPTRVCILAQGKLCISRVLSKAYTACTVCPCVIHK
48	WP_014342261.1	7	7		0.78	0.88	0.855	AMP	1	AMP	0.794	NAMP	AMP	0.976	WP_014342261.1	AMP	0.9998	MQDSPNSSWGPSIEEKGISVQFSAWSLWACRVQGMVFVFRILFLAFFMGYNRAHETRVDKCSDVSLRMGKCAGRISRRRCKGIVPYYSLRSRRTALWRFG
49	WP_014342281.1	8	8		0.967	0.97	0.988	AMP	1	AMP	0.97	AMP	AMP	1	WP_014342281.1	AMP	0.9994	MGVDGHATHKMLAGGWAGGNRRAACVGAIPTISCLPLRRSSIVFLVRTAPVCVCARSASLLLGRPCLTCPPSRCEAGRVYPSVRMSSLLEGLGATIFICNAPDAVVLLHGCGEKDTLKYIALLRTRNCSSRGNRDTLGEKTAPC
50	WP_014342304.1	4	4		0.258	0.41	0.245	AMP	0.854	AMP	0.92	NAMP	AMP	0.9	WP_014342304.1	AMP	0.9992	MSLRWTCMQCGGPLHTEEEAVLCAFSRVSLPRREAQTFSVPYRGHTNDRAPTEQSRETHPHPPDFPPQLWGECFFACARARSVLR
51	WP_014342308.1	0	0		0.01	0.098	0.009	NAMP	0.035	NAMP	0.045	NAMP	NAMP	0.007	WP_014342308.1	Non-AMP	0.0013	MLRWLASVECRVEWVEEPLVVGCTAAPVHDVVISEGGGALTADGSYPIERKEGSSIWQRYQQQLMLSRLTT
52	WP_014342380.1	0	0		0.012	0.096	0.025	NAMP	0.09	NAMP	0.0715	NAMP	NAMP	0.387	WP_014342380.1	Non-AMP	0.4426	MALVYGAGIAEVYDFTGTAHDWSFGGFVQTAVEGGHPLRGTPGRARATVRSIRRLDVRLFLLLACP
53	WP_014342387.1	8	8		0.955	0.92	0.94	AMP	1	AMP	0.8335	AMP	AMP	1	WP_014342387.1	AMP	0.9946	MAFERTQLCTRACAINTFEYNKVMQNIHLCPLRVSFPLKTVQHVHPRRKCNAHVYTALQNKTAYRKNQTVVPRTKVPAQSVRASFSLLAKISSLHHQLSDQYIVPTAQNCYRRRDYERARCTYPVH
54	WP_014342393.1	7	7		0.714	0.859	0.655	AMP	1	AMP	0.528	NAMP	AMP	1	WP_014342393.1	AMP	0.9389	MARAQVRLSGRFLALGGYSLYAAGLVLLLYRAVGVYVWIHFYQNQTLSQLSTHARSSWVSIGGHASLFLGAVLLTVRDVRTFRDDSTMWIAPVVLWSAATYSSMGACGFSLRAVASGACGVLLFAVWSLASELGRRRP
55	WP_014342399.1	3	3		0.693	0.538	0.478	NAMP	0.019	AMP	0.9605	NAMP	NAMP	0.245	WP_014342399.1	Non-AMP	0.02	MCAPLYDPPLAFTIPQAEVSHMNERNKLLARALYSCVPHVQGSDDYEDDFEDSDFQDGDFDDFEDEDGFDDDDDFEDDDFEYEDEDNDLDFDE
56	WP_014342403.1	8	8		0.874	0.894	0.913	AMP	0.999	AMP	0.9665	AMP	AMP	1	WP_014342403.1	AMP	0.9999	MQILQQVAQGIASHFGHDCEVAVYGVSSDGKNCAVDFITNGRVTSSRVGDRPRLSLFKNYGIETGKGGSTTSFARRTAAPLSRACCIFVTNIARLRRF
57	WP_014342432.1	8	8		0.989	0.966	0.989	AMP	1	AMP	0.9815	AMP	AMP	1	WP_014342432.1	AMP	1	MPAADVDHGRTTRVGVRFFCESCGSEVKRDARLCVHCGSFFSSIRCPSCKHAGNARDFEKGCPSCGYAFGNENRRKGSPPAPKGAPRRAEEALPTWVYAAICLLGVCVGTVAMWYL
58	WP_014342455.1	7	7		0.508	0.584	0.715	AMP	0.908	AMP	0.959	NAMP	AMP	0.751	WP_014342455.1	AMP	0.9824	MLIHTRPPWSAARVARIARLGNRSCKKGVPAYGAGSLYLKTGPMRNEYGKRSVPCRVNPTDPVTAQSIPYYAPVVFGDLDIFLEVWTD
59	WP_014342464.1	4	4		0.579	0.402	0.267	AMP	1	AMP	0.9725	NAMP	AMP	1	WP_014342464.1	Non-AMP	0.0048	MSAAWVGNMDKGVMVRLAEVEDAAAVLVEKAQEQAQRMRESAEAAGETLVKEAEGSVVEAQEQAWHEACARIDAQRREACGQLERELSVLEEDVERFEAFLDGFFFG
60	WP_014342466.1	1	1		0.119	0.151	0.337	NAMP	0.313	NAMP	0.316	NAMP	NAMP	0.052	WP_014342466.1	AMP	0.9778	MRYCVSRFLFLCRSHGRFSVLGTGSERLKSLFLRTLWCSMRHGCAERYDTLTPGGGLPSGGHASALAD
61	WP_014342468.1	1	1		0.125	0.276	0.428	NAMP	0.023	NAMP	0.0275	NAMP	NAMP	0.005	WP_014342468.1	AMP	0.8804	MRLILTIFQKKIQYPHRSDASHHCSPACAPYTRTGWGTDPSSLLTFSMRNDIPRRVLIPL
62	WP_014342469.1	1	1		0.009	0.066	0.041	NAMP	0.171	NAMP	0.161	NAMP	NAMP	0.053	WP_014342469.1	AMP	0.9669	MDTLYPHTALRKVDLPEEGLPIMSDTPLLGEAPSVTICTVLSIKERRYHCSPCSGTRQQKAVGYLTLPRVGGFNP
63	WP_014342476.1	0	0		0.089	0.328	0.113	NAMP	0.082	NAMP	0.0415	NAMP	NAMP	0.004	WP_014342476.1	Non-AMP	0.0778	MGARDNLNAIDLSHITHWGTKPDENWRAECTKGTQVMQGRGVVVSSSSFIYFEKDTLLFLRECVRMARSL
64	WP_014342516.1	2	2		0.175	0.327	0.197	NAMP	0.28	NAMP	0.0465	AMP	NAMP	0.048	WP_014342516.1	AMP	1	MPRVCFLSKKKEWGEWLWRVPLSGVDCRYEHHERAVGVAKTRLPGPNAVGNAGTCTVPCSL
65	WP_014342519.1	5	5		0.958	0.899	0.949	NAMP	0.396	NAMP	0.3525	AMP	NAMP	0.032	WP_014342519.1	AMP	0.9999	MSASSPLKVLDYLRHHRIEGHCNGKVLLCAMLTKSACLEKVYQSHYTGARGFCCFSESFKRLSRSFTG
66	WP_014342537.1	5	5		0.38	0.628	0.598	NAMP	0.211	AMP	0.6575	NAMP	AMP	0.548	WP_014342537.1	AMP	0.8635	MARFLSNFFARVASFSSLLPGDLSCRASSPFLSHGVTFCDHLQYMRRGKVSARAGARVPHTALQYTTAGMQDCKENVRAPV
67	WP_014342568.1	0	0		0.052	0.204	0.242	NAMP	0.039	NAMP	0.012	NAMP	NAMP	0.001	WP_014342568.1	Non-AMP	0.0074	MRSERVVFPESMCALMPIFLKVEIPLLIAIPSSSGTGAQRNKPSGKRQGPAPQQTG
68	WP_014342583.1	5	5		0.044	0.49	0.053	AMP	0.991	AMP	0.8925	AMP	AMP	0.984	WP_014342583.1	AMP	0.5431	MREHSAHVVIDDHEALLLLVLSSGPAALASLPLHPVLGKGYRNTPGALEEKAVRISCVRECLNVVQIGGRIPVLLTSAAELPRLGSCVR
69	WP_014342588.1	7	7		0.936	0.888	0.97	AMP	1	AMP	0.87	NAMP	AMP	1	WP_014342588.1	AMP	0.999	MHRSTDDNFHFLSIPSWGMPPCVRFLQHAPTQSQDTPCTRQGCSPFIYARRAGTPLRAARTAKTMQPRETSSCKRKTQYNLGSVTSGAHTITPAHAKLPLAQRYCKFTRVTREQHYPENNWENGLICRTPADTL
70	WP_014342596.1	1	1		0.173	0.455	0.577	NAMP	0.371	NAMP	0.324	NAMP	NAMP	0.017	WP_014342596.1	Non-AMP	0.0042	MAVSPFSWADSVNSMHLHAVRYIRVRLQRMRQMAAIQRKERGGPACSRQAPGDRIRFNRRTRCLESEHRAIS
71	WP_014342607.1	1	1		0.42	0.3	0.365	NAMP	0.147	AMP	0.607	NAMP	NAMP	0.045	WP_014342607.1	Non-AMP	0.3702	MYPTHKRGKQYVHESLHVPARTQTPTDTARVKSSTQRYGYEFIPSSPVPATYTYTLPTVHKLLPACTISTPRTLKIAD
72	WP_014342609.1	4	4		0.35	0.74	0.2	AMP	1	AMP	0.982	NAMP	AMP	1	WP_014342609.1	Non-AMP	0.0002	MLNLGQVKVLEEKVAKAVHLVQMLKEENAALRAEIDGRGKRITELEQLVLAFQDDQTKIEEGILKALNHLSTFEDSAYGEALTQHAAKVLENREHAGLSEELTSRTQMEIF
73	WP_014342625.1	1	1		0.25	0.56	0.215	NAMP	0.056	NAMP	0.02	NAMP	NAMP	0.057	WP_014342625.1	Non-AMP	0.4818	MIIMHSSVESLTFLQDVRALQGPVHRTRAETGQSYFRKNGKGLEVFFAFFVTFLGRYVRVCVGYAG
74	WP_014342652.1	0	0		0.028	0.21	0.042	NAMP	0.042	NAMP	0.186	NAMP	NAMP	0.009	WP_014342652.1	Non-AMP	0.0007	MEETSHALPCVSCTEQEARQTVMGLRYSIAGLIVSDCTPSGNNLLSMLFQRRSQTVGKGHLVDSLLVINLHSAA
75	WP_014342674.1	5	5		0.584	0.55	0.792	NAMP	0.42	AMP	0.5625	AMP	NAMP	0.404	WP_014342674.1	Non-AMP	0.3927	MHDSGTGTGFVQVARRTDIVTLSIEGAARPVGQSKLGYAGSVRFSRGLKSRATYKPIHGHASRMTAAKSAKEDACTAR
76	WP_014342678.1	6	6		0.5	0.83	0.479	AMP	1	AMP	0.919	NAMP	AMP	0.999	WP_014342678.1	AMP	0.954	MRPLSVDPSIEHNYRSDVAPAQLATSYSPSRIIHDLPIIPWGVSAIQSRVLLSGVHRAACTTCSGWFTVLHSLCYTSRAVCARRNGIFFNLWEDTWLSTSFKLK
77	WP_014342694.1	1	1		0.144	0.4	0.176	NAMP	0.325	NAMP	0.0955	NAMP	NAMP	0.148	WP_014342694.1	AMP	0.9306	MVHPKVKPTVTRTTPITIDVVMCVLLIFFKGAKLSCERLEVCANSVKDLVARLLRESPFLFPV
78	WP_014342699.1	8	8		0.963	0.92	0.975	AMP	1	AMP	0.89	AMP	AMP	1	WP_014342699.1	AMP	0.9986	MPSANSLALINKDCPHPSAPLSTRSGSLRVGARSRMFATPTRRDIKPAKIPPTGAAPRKNRSASCAHPRPQPYSIGERRAKTAAPISSTPTKTAPTTASRAKSPDRLIKIILCQAALAQRQLECVYSPDSCGKLPEETFC
79	WP_014342759.1	6	5	0.11	0.443	0.5	0.157	AMP	0.992	AMP	0.9315	NAMP	AMP	0.974	WP_014342759.1	AMP	0.9114	MCNAGVMGSGVYFSVSGCVYVVSIVDNVRAEVDVSRETCGMRSGIKSTLILEDYLGSRSCKLYGGCVWGLVSDFPSAVLQVYVYSH
80	WP_014342765.1	7	7		0.633	0.9	0.803	AMP	1	AMP	0.857	AMP	AMP	1	WP_014342765.1	Non-AMP	0.0681	MKVRGIPVLQRRTWALVLLVLSSTSACVRKNSLEDVRFPSSSPIGEARRFAVITKAYVLLRDKPGVTGIVIAYARRKDIFPVLGIDLLSKDKESALWVNVERGWLPWDCVQLYSSKAKALAASKKLS
81	WP_014342772.1	6	6		0.923	0.911	0.848	AMP	1	AMP	0.9785	NAMP	AMP	0.995	WP_014342772.1	Non-AMP	0.1738	MVAPETSSMESRAQKTQFHPDGEGKSNTGAARAGRNHSAAFARYAPATKWKAEYCGYYECGVVVSPLEKVEIRLSWEQGKLQENSNVVIEKNVTERWQFVGACRLIW
82	WP_014342773.1	9	8	0.05	0.96	0.935	0.985	AMP	1	AMP	0.952	AMP	AMP	1	WP_014342773.1	AMP	0.9997	MLAFDAGGRPTPGSGCRLGLGRGLLGLCNGQACTPASYKMSSAAAGTAAPARARAWNEVFCVKGMCARVLFLCSTSYQEQGLQQQLFCSYRRTCCGLLLLGRRPCCLCPPSAHLPCLMAPPSDAMPPTRLRS
83	WP_014342778.1	0	0		0.039	0.363	0.027	NAMP	0.343	NAMP	0.0495	NAMP	NAMP	0.084	WP_014342778.1	Non-AMP	0.134	MVSPLEKVEIRLSWEQGKLQENSNVVIEKNVTERCQFVGTVPRWVCSREGQGFVRSGLLRNIH
84	WP_014342791.1	7	6	0.38	0.845	0.792	0.901	AMP	0.568	NAMP	0.4205	AMP	NAMP	0.289	WP_014342791.1	AMP	0.8978	MAGASKNSRTAAATQRFNCPCGGEVVLRSIVDNGKVKNIAECPKCRRVERRPRDFN
85	WP_014342792.1	7	7		0.626	0.761	0.796	AMP	1	AMP	0.846	NAMP	AMP	1	WP_014342792.1	AMP	0.8364	MRTIQRVHLFKIEPNPFQPNQLGTTKEYRNYTAGKAPQGPEQRAEGDTTSPLAAHTQKTRTQRDGHSAREGKNLKKPSTHASGQTVRDSPQDTSALTLVRLQFAPTPFSYRAA
86	WP_014342798.1 Tp0451a	9	8	1.37	0.982	0.965	0.931	AMP	1	AMP	0.607	AMP	AMP	0.998	WP_014342798.1	AMP	1	MGCGSHCNCNVGYHRSLHCYGNELHGKQCGFSRCGEGFPAFVAVLMMPFSYSIAEGVMWGIIAYVILNAVIGRARAITHTWGIWCRWGKVWRRS
87	WP_014342799.1	1	1		0.156	0.093	0.204	NAMP	0.057	NAMP	0.179	NAMP	NAMP	0.002	WP_014342799.1	AMP	0.9985	MDYSSFQSFPLFPPITALMQTWHVPAPITGTETPLPKTKHTAAPRGRYPRHRGGGIGGSRASSSGCTVS
88	WP_014342809.1	8	8		0.979	0.935	0.963	AMP	1	AMP	0.972	AMP	AMP	1	WP_014342809.1	AMP	0.9994	MWRKCLGKVVLLGCALPCVAARISVSPKLGAYGDARGGPDLWGLCIKATDAEEVSGDPDDTEMEYLPPRYAPETPLVGLDVAFRAENGFLLQLTVDAALTRLMFRGQCLAGYSFRPGGGKYVSVGSGGF
89	WP_014342851.1	8	8		0.978	0.91	0.938	AMP	1	AMP	0.9185	AMP	AMP	1	WP_014342851.1	AMP	0.9983	MCGYSARAAFFLAVALTVGVCVAACKTAPRADTHFVHIFVADMFHISYEALPCTVHFEHAEHETYRTDINGRITVPLGGRRVIGVSYDFTQYQRPSGRLLARKDFLHVVAVRDAPHDGKYAVEVPVHVTRTCLILLPRKI
90	WP_014505460.1	1	1		0.186	0.07	0.213	NAMP	0.05	NAMP	0.0215	NAMP	NAMP	0.017	WP_014505460.1	AMP	0.9749	MPARGRPSSSSDFCLYGMAVVNGFCVQDIPYGSRVVLPGRMRSSSAGA
91	WP_014505533.1	0	0		0.05	0.28	0.071	NAMP	0.079	NAMP	0.043	NAMP	NAMP	0.004	WP_014505533.1	Non-AMP	0.118	MGARDNLNAIDLSHITHWGTKPEENWRAECTKGTQVMQGRGVVVSSSSFIYFEKDTLLFLRECVRMARSL
92	WP_080511233.1	7	7		0.228	0.66	0.512	AMP	1	AMP	0.9885	AMP	AMP	1	WP_080511233.1	AMP	0.534	MHLKSVSAFLDDLIEESVERVGKPAALMSKKEKTDAIHFLSQIGAFLITRAEDRVSHYFGISKYTPTVISKLANRDRTGLSPQQRDRRALLLPWFKLLGEDNSSGADRSHHAPTRPEILGHHR
93	WP_080586084.1	2	2		0.06	0.44	0.04	AMP	0.496	NAMP	0.088	AMP	NAMP	0.105	WP_080586084.1	Non-AMP	0.2346	MWGRVSPLEKVEIRLSWEQGKLQENSNVVIEKNVTERCQFVGTVPRWVCSREGQGFVRSGLLRNIH
94	WP_080637337.1	8	7	0.65	0.725	0.71	0.327	AMP	1	AMP	0.527	AMP	AMP	0.953	WP_080637337.1	AMP	1	MGWKRAWFTGVFAGLCVLLNAESQPPSHVDGGLKCIAAGLAVGLACVGGGLAVGKIGAAAMGAMSEDPEISGKALPFIGLAEGICLWGFLVALLIILL
95	WP_081248083.1	0	0		0.05	0.47	0.025	NAMP	0.387	NAMP	0.0915	NAMP	NAMP	0.107	WP_081248083.1	Non-AMP	0.0515	MWGRVSPLEKVEIRLSWEQGKLQENSNVVIEKNVTERWQFVGTVPRWVCSREGQGFVRSGLLRNIH
96	WP_108303615.1	6	5	0.62	0.238	0.33	0.39	AMP	0.987	AMP	0.846	AMP	AMP	1	WP_108303615.1	AMP	0.9947	MDHVVTLYCAGSTRPFSSSSAFRAASSAALRAASSSARLRSSCAFWAAILCSSSFRASAALRAASSSARLRSSCAFWAAILCSSSFRASAALRAASSFAAFASN
97	WP_125982071.1	2	2		0.094	0.29	0.131	AMP	0.539	NAMP	0.479	AMP	NAMP	0.146	WP_125982071.1	Non-AMP	0.0461	MCACAALLGQRACAGFLVLFCVRRQLVSELLLEIPENAAGRTAQQFFSYMLFLQHRSLRQHSVHRGLRAVQV
98	WP_137412623.1	7	7		0.506	0.77	0.381	AMP	1	AMP	0.9095	AMP	AMP	1	WP_137412623.1	AMP	0.999	MPLNILERTHHVGRIDDLPRVISQGVLDVHHTLICDFHARHASTGKILTARAVSVPCALDRIAVIGDKPGEVLGACGPLLASCAVLCGKRGGVAFE
99	WP_154813484.1	0	0		0.056	0.11	0.012	NAMP	0.038	NAMP	0.0535	NAMP	NAMP	0.001	WP_154813484.1	Non-AMP	0.0005	VELSAQWEQGVLADAPYMGIAESMWSERYFGTFICGVKVVW
100	WP_154813485.1	0	0		0.029	0.49	0.007	NAMP	0.111	NAMP	0.04	NAMP	NAMP	0.008	WP_154813485.1	Non-AMP	0.0001	MVSPLEKVEIRLSWEQGKLQENSNVVIEKNVTERWQFVGACRLIW
101	WP_154813486.1	1	1		0.21	0.3	0.47	NAMP	0.251	NAMP	0.3615	AMP	NAMP	0.167	WP_154813486.1	Non-AMP	0.0206	MVSAVAHPARRLGTAVSRPTGAGCVLRRGDFHLFFYNGEEKKRWTGEGVLKRRGA
102	WP_155105310.1	1	1		0.28	0.41	0.2	NAMP	0.037	NAMP	0.0025	NAMP	NAMP	0.005	WP_155105310.1	AMP	0.9919	MPLKCSLGKNYARGYQIGAGVYSCIFSYPLHHSPNVQAEHTTFLISLTGDAHSL
103	WP_155758685.1	1	1		0.23	0.45	0.49	NAMP	0.225	NAMP	0.327	NAMP	NAMP	0.218	WP_155758685.1	AMP	0.9553	MAIRRGMSLDLVGMYGSFLSEGANLRPFGRYAKIPRIGSYVTRYVEFLRRRISGRA
104	WP_158296018.1	7	7		0.61	0.81	0.55	AMP	1	AMP	0.9225	NAMP	AMP	0.999	WP_158296018.1	AMP	0.9995	MYDSYHYITIQAPNEGSVCSFEHGGWYVPKTVLSLLRRRKCQDARAESEELGITGICQNYAVPVQLGVQHYFGAHWGIDATATVSFGVDTKLAKFRIPYTLRVGPVFRT
		9/9: 2/104	8/8: /104
		8/9: 14/104	7/8: /104
		7/9: 21/104	6/8: /104
		6/9: 10/104	5/8: /104
		5/9: 8/104	4/8: /104
		4/9: 9/104	3/8: /104
		3/9: 7/104	2/8: /104
		2/9: 3/104	1/8: /104
		1/9: 16/104	0/8: /104
		0/9: 14/104

## Sheet: Potential AMP rankings 1-68 
Supplementary Table S3. AMP probability rankings for 68 T. pallidum miniproteins of unknown function. List is based on whole proteome annotations from the NCBI Genome database July 2021.
					iAMPpred (SVM)			CAMP (SVM)		CAMP (RFC)		CAMP (ANN)	CAMP (DAC)		AMP Scanner V2
Rank	Protein Locus Tags (Tp [old tag], TPANIC [new tag])	Protein Accession Number	No. of positive AMP predictions	Mean probability score	antibacterial	antiviral	antifungal	Class	AMP Probability	Class	AMP Probability	Class	Class	AMP Probability	Prediction_Class	Prediction_Probability	Sequence
1	TPANIC_RS02215	WP_014342432.1	8	0.989357	0.989	0.966	0.989	AMP	1	AMP	0.9815	AMP	AMP	1	AMP	1	MPAADVDHGRTTRVGVRFFCESCGSEVKRDARLCVHCGSFFSSIRCPSCKHAGNARDFEKGCPSCGYAFGNENRRKGSPPAPKGAPRRAEEALPTWVYAAICLLGVCVGTVAMWYL
2	Tp0130 / TPANIC_RS00660	WP_010881579.1	8	0.9868	0.992	0.977	0.994	AMP	1	AMP	0.948	AMP	AMP	1	AMP	0.9966	MGRPPASKASNVFKDVFLTNAMDMQTHDCARSMGHKKNGANGDIGADCVSVETRSASQAMPWALHLKLVAPEPSGKEAHIKGQTRPASYRLGGQRQSGQGPSRNSQHVRRYEQKGHAPCCSCCSYEVEGRILLSMPARK
3	Tp0618 / TPANIC_RS03055	WP_014342809.1	8	0.978343	0.979	0.935	0.963	AMP	1	AMP	0.972	AMP	AMP	1	AMP	0.9994	MWRKCLGKVVLLGCALPCVAARISVSPKLGAYGDARGGPDLWGLCIKATDAEEVSGDPDDTEMEYLPPRYAPETPLVGLDVAFRAENGFLLQLTVDAALTRLMFRGQCLAGYSFRPGGGKYVSVGSGGF
4	Tp1032 / TPANIC_RS05100	WP_010882476.1	8	0.970743	0.937	0.944	0.949	AMP	1	AMP	0.9745	AMP	AMP	1	AMP	0.9907	MACGENERASTSPPNRAAAARGGRLTLLDGCCVALVLALTAWSGFFVYRMQGGARTLDIRCGAQRWTYPLDQERVIRVRGPLGETEIEIRAGAARVCRSPCANGTCIAHPPVQRVGEWNACLPNGVFLYVHGTDAAEPEADAVQ
5	TPANIC_RS04860	WP_175393422.1	8	0.962371	0.969	0.92	0.93	AMP	1	AMP	0.92	AMP	AMP	1	AMP	0.9976	MALTVGVCVAACKTAPRADTHFVHIFVADMFHISYEALPCTVHFEHAEHETYRTDINGRITVPLGGRRVIGVSYDFTQYQRPSGRLLARKDFLHVVAVRDAPHDGKYAVEVPVHVTRTCLILLPRKI
6	Tp0914 / TPANIC_RS04500	WP_010882357.1	8	0.952257	0.897	0.948	0.873	AMP	1	AMP	0.961	AMP	AMP	1	AMP	0.9868	MTDVQSSGRRRKRKRTPRRDVFSPKLEFCEYVCPRCKEVIKDLPVALGDKDSGRPVHFDCVLSFLRESECLAAHEHVVYVGQGKFAVIVFPNPASTTCFSIVRLIEWETKNTLLEWRAGVAKICSQVS
7	TPANIC_RS05280	WP_014342403.1	8	0.949486	0.874	0.894	0.913	AMP	0.999	AMP	0.9665	AMP	AMP	1	AMP	0.9999	MQILQQVAQGIASHFGHDCEVAVYGVSSDGKNCAVDFITNGRVTSSRVGDRPRLSLFKNYGIETGKGGSTTSFARRTAAPLSRACCIFVTNIARLRRF
8	Tp0451a / TPANIC_RS02200	WP_014342798.1	8	0.926143	0.982	0.965	0.931	AMP	1	AMP	0.607	AMP	AMP	0.998	AMP	1	MGCGSHCNCNVGYHRSLHCYGNELHGKQCGFSRCGEGFPAFVAVLMMPFSYSIAEGVMWGIIAYVILNAVIGRARAITHTWGIWCRWGKVWRRS
9	Tp0355 / TPANIC_RS05260	WP_010881803.1	7	0.969629	0.991	0.959	0.983	AMP	1	AMP	0.8555	NAMP	AMP	1	AMP	0.9989	MQGSVQIQKGNISSSYTPEKHPSHPTSANGSMSPKRICELRKEDPSSLHKQLLKNSLEKGTEHCDRTTKTYGQIFQLFCLCCAGAAPFYRARAFRLQSTFLIYTLHCSSDSVSTSTHYFRRLYSRRW
10	Tp0563 / TPANIC_RS02775	WP_010882010.1	7	0.945471	0.848	0.919	0.92	AMP	1	AMP	0.973	NAMP	AMP	1	AMP	0.9583	MSMTSFYERIGAILRDRLNSDEDPFDQWDNRGGKYRTCAGRMERRPPPKKNPPPGPVRVPVPPELVEDFAVLSVPAGLPLSYCKQSWKRLLKKYHPDVFTCTHTSEQAADIVRRINSSYKRIETWFETGALPTDNKS
11	Tp0787 / TPANIC_RS03900	WP_010882232.1	7	0.922043	0.908	0.927	0.752	AMP	1	AMP	0.8715	NAMP	AMP	1	AMP	0.9958	MHCPLLRHTVVIEWAAPSMVGSAPMGRDSPAGMREAVYFLHRMVVCLGVLLCAASLLYVFGNFSHFLDKSQFIILRSCVGCSVLLVVACLCAGSFELYFFLTRSDAPYGRLLCITVVALLFGMGALVFNTVVLIVAKGT
12	Tp0802 / TPANIC_RS05355	WP_010882247.1	7	0.915414	0.874	0.76	0.94	AMP	1	AMP	0.8395	NAMP	AMP	0.999	AMP	0.9954	MQHAPTQSQDTPCTRQGCSPFIYARRAGTPLRAARTAKTMQPRETSSCKRKTQYNLGSVTSGAHTITPAHAKLPLAQRYCKFTRVTREQHYPENNWENGLICRTPADTL
13	Tp0617 / TPANIC_RS03050	WP_158296018.1	7	0.840429	0.608	0.808	0.546	AMP	1	AMP	0.9225	NAMP	AMP	0.999	AMP	0.9995	MYDSYHYITIQAPNEGSVCSFEHGGWYVPKTVLSLLRRRKCQDARAESEELGITGICQNYAVPVQLGVQHYFGAHWGIDATATVSFGVDTKLAKFRIPYTLRVGPVFRT
14	Tp0214 / TPANIC_RS01065	WP_010881662.1	7	0.802843	0.963	0.885	0.984	AMP	0.926	AMP	0.643	AMP	NAMP	0.22	AMP	0.9989	MSKAHRGKGIRGMVGRGRGVCPVTGQTGVKLLYECEIDGKKVKVSKVGRATLQNRKRRLDAQPGA
15	Tp0913 / TPANIC_RS04490	WP_010882356.1	7	0.799214	0.884	0.891	0.869	AMP	1	AMP	0.932	AMP	AMP	1	Non-AMP	0.0185	MPKHNKLLGAFGEAYAARWLATRGYIIITRNWRRATGEIDIIAQQDDTIVFVEVKTLRCTSYADLAIIVGKRKQKRICETAKHFLASAREYNHMCARFDVIVLRSDPFRRQDVDIVHLPHAFEDLV
16	Tp0638 / TPANIC_RS03150	WP_010882083.1	7	0.768743	0.506	0.813	0.24	AMP	1	AMP	0.839	AMP	AMP	1	AMP	0.9832	MGTLRRFPASVLQIALALFLLASGARDLVHVDAGVFNAAVYFLGGLFRGHVAIGVLTLAVSLCCLTAGFFLLVDFLRPELSCVSAVLALFVVLWALNMVLVDVVGAFGRGKVLQNVSSALEHLHHTAVDLLVLGALIFVRQHTR
17	Tp0031 / TPANIC_RS00155	WP_010881480.1	7	0.7645	0.34	0.739	0.562	AMP	1	AMP	0.7175	AMP	AMP	0.993	AMP	1	MDLGQRVVRVIPLAPLPVRVYNAGGLRVDFFPRFFGRSPQGVGVGFARLKLSASVGSNGFRLTRAVWIFWLCFLVSGLSRAFLVYFLSVIRI
18	Tp0069 / TPANIC_RS00335	WP_014342765.1	7	0.750871	0.633	0.895	0.803	AMP	1	AMP	0.857	AMP	AMP	1	Non-AMP	0.0681	MKVRGIPVLQRRTWALVLLVLSSTSACVRKNSLEDVRFPSSSPIGEARRFAVITKAYVLLRDKPGVTGIVIAYARRKDIFPVLGIDLLSKDKESALWVNVERGWLPWDCVQLYSSKAKALAASKKLS
19	Tp0869 / TPANIC_RS04290	WP_010882312.1	7	0.739057	0.624	0.793	0.882	AMP	0.968	AMP	0.7295	AMP	NAMP	0.177	AMP	0.9999	MRSCPKRARGVHWATGAALWCPSRMIFEKISPLQAFVWAVLRLFLKSFRTVFRGAVRAGCGVLACVRAYGFPPYGSKE
20	Tp0467 / TPANIC_RS05295	WP_010881916.1	7	0.7115	0.516	0.719	0.852	AMP	0.977	AMP	0.9535	AMP	AMP	0.934	Non-AMP	0.029	MNSYFSALPLKCVRRPFILSRNEGWGIKRFYVADEPHRSFLCMQEGVRRGGGESEITQRKADVLRKSIRSADRYKEDRSCRT
21	TPANIC_RS05275	WP_080511233.1	7	0.702643	0.228	0.656	0.512	AMP	1	AMP	0.9885	AMP	AMP	1	AMP	0.534	MHLKSVSAFLDDLIEESVERVGKPAALMSKKEKTDAIHFLSQIGAFLITRAEDRVSHYFGISKYTPTVISKLANRDRTGLSPQQRDRRALLLPWFKLLGEDNSSGADRSHHAPTRPEILGHHR
22	Tp0867 / TPANIC_RS05365	WP_010882310.1	7	0.687371	0.682	0.818	0.836	AMP	0.7	AMP	0.6455	AMP	NAMP	0.132	AMP	0.9981	MRWLCRLIGYRYGYAVCGGYRRQGGRCSAQLHAQYTRVSHCVLRIAWEVNGADYELFRLWI
23	Tp0955 / TPANIC_RS05515	WP_010882399.1	6	0.8347	0.403	0.862	0.883	AMP	1	AMP	0.7475	NAMP	AMP	0.959	AMP	0.9884	MTGVPTPILIIPIHEIKSFQNRLDIRDAARWIALATVLERAQFFLKNFTIFELFPGLPARHRRKHKLIFPLRSRAWLLWGSSRKVPLRFK
24	Tp0749 / TPANIC_RS05345	WP_010882194.1	6	0.784286	0.961	0.943	0.979	AMP	0.624	AMP	0.8435	NAMP	NAMP	0.14	AMP	0.9995	MQDKALFSGALDTPFMQVITWARLYHKNQKRYEKIKKSFTFHETCLQSTKGIVAERILKPCVRRKVNGKFRST
25	Tp0220 / TPANIC_RS01095	WP_010881668.1	6	0.759086	0.795	0.903	0.618	AMP	1	AMP	0.9975	NAMP	AMP	1	Non-AMP	0.0001	MDNINIAKDVRPGCVLLTVTGAVSSYTYGEFESRVHGALKENHVVLDLSGVTAMSSSGLGVLISAYDEGLKYQRRLCILNPSESVRRAIELTGFSEMFTVIKSLDELD
26	Tp0753 / TPANIC_RS03730	WP_010882198.1	6	0.756571	0.789	0.865	0.575	AMP	0.895	AMP	0.931	NAMP	NAMP	0.355	AMP	0.886	MTYGKLIFFIIVLVGFALFMSFNVEHRCDVSLVFYTFQAVPITLSLLFAFACGALTALLFLIDPDAKTRKQKREDSPTSAPTGGVSSPEHVDVP
27	Tp0004 / TPANIC_RS00020	WP_010881454.1	6	0.748443	0.706	0.911	0.624	AMP	1	AMP	0.9915	NAMP	AMP	1	Non-AMP	0.0066	MNNGVNKLSDLLVLTTEYIQASYETEAFDAHREWVCIVGNPVALHSTLVDIRNGKVVVKVTHPGWAQYLLLKKDEIVHALRRRYPSLGVTGMSTYVDSTSRTPSAKKDMQGLSVSEKQTRPVPELAEVFEQLRTLFQVKTEEPSH
28	TPANIC_RS05485	WP_025267569.1	6	0.723843	0.261	0.641	0.434	AMP	0.959	AMP	0.83	AMP	AMP	0.942	AMP	0.9999	MLFRAYIPERLCHHATSCTARACGEVLSVLLFALAHRPAGSATLFAGAAGAALRVLFVREKKRSGSRARASALCTAVHALWNAYAIAAAAR
29	Tp0310 / TPANIC_RS01535	WP_010881759.1	6	0.723557	0.758	0.864	0.446	AMP	1	AMP	0.95	AMP	AMP	1	Non-AMP	0.0469	MAAICPSSTAKAGGGGISVDPLNAVIVEGNVVPSASARVPEAAVCAFCIQTQRRVQGEGRVHTEVSYFEVEAWDALARVCAQQVRPGVGLRVVGRLKQDRWQQEDGVRVQRVKIVAEHVEFQTPFVW
30	Tp0370 / TPANIC_RS01810	WP_010881818.1	6	0.715871	0.829	0.578	0.593	AMP	1	AMP	0.973	NAMP	AMP	1	Non-AMP	0.0381	MSAQTQRLHPPFYDKRTQRVNSPFSLPAPKTQEKKYLCLLGTVDSVCAPLYDPPLAFTIPQAEVSHMNERNKLLARALYSCVPHVQGSDDYEDDFEDSDFQDGDFDDFEDEDGFDDDDDFEDDDFEYEDEDNDLDFDE
31	Tp0251 / TPANIC_RS01265	WP_010881700.1	6	0.711	0.193	0.643	0.284	AMP	1	AMP	0.9755	AMP	AMP	1	AMP	0.8815	MKRVRRTRSFVVDALCDEVDLSRRHVARVVDSFVSVVTAALERGETVELRDFGVFESRVRKASVGKSIKTGEVVSIPSHCVVVFRPSKRLKSAVRGYRSGEVGAD
32	Tp0352 / TPANIC_RS01725	WP_010881800.1	6	0.693429	0.879	0.849	0.786	AMP	0.718	AMP	0.9785	NAMP	AMP	0.641	Non-AMP	0.0025	MREKEGGVVNDDFHYEVTRNWGTLSTSGNGWSLELKSISWNGRPEKYDIRAWSPDKSKMGKGVTLTRAEIVALRDLLNSMSLDPY
33	Tp0360 / TPANIC_RS05425	WP_014342791.1	6	0.673329	0.845	0.792	0.901	AMP	0.568	NAMP	0.4205	AMP	NAMP	0.289	AMP	0.8978	MAGASKNSRTAAATQRFNCPCGGEVVLRSIVDNGKVKNIAECPKCRRVERRPRDFN
34	TPANIC_RS05495	WP_041610078.1	5	0.691429	0.422	0.752	0.178	AMP	1	AMP	0.8175	NAMP	AMP	0.774	AMP	0.8965	MHGVIEMVDVVSGFFSNSMSFLRVGAFALSHAVLSFVVFTMTQFVGGYASLWGILVYVFGNGVIIFLEGLIVAIQAVRLQYYEFFSKFFTKSGSVFAPFRFGYQED
35	Tp0222 / TPANIC_RS01105	WP_010881670.1	5	0.636743	0.337	0.798	0.342	AMP	1	AMP	0.978	AMP	AMP	1	Non-AMP	0.0022	MWKRGVGALLWGMVLLRSFVAYADSQAATGGLLKEIMGEVASIRLESNMLKQQLRERHAESAALKKALQTLDVKLEKAAKALEESEHALSESKELIETLRSELEILRQRVNALNMRLRRLEITNNVLIGVAVVCGVAAIGAGIYAAVK
36	Tp0412 / TPANIC_RS02015	WP_010881860.1	5	0.636114	0.345	0.742	0.412	AMP	1	AMP	0.953	AMP	AMP	1	Non-AMP	0.0008	MGIRGELFTTEVQAENRTYFFNVKENRVGDVFLQVVESKNVDGAGFDRHAVVVFEEEMQKFLQGFNRSLDFLEKNKKERLHLRQARSLHTRGERKTIVRKK
37	Tp0128 / TPANIC_RS00655	WP_010881577.1	5	0.628857	0.105	0.312	0.106	AMP	1	AMP	0.883	AMP	AMP	1	AMP	0.996	MEFLRATASREVDVNSGWGYGSGVERGFLCEGDVRACLVPASHFVRAGTAPGTTPGTAAACLFVPPYVLGVTPAGTLPFGLPSQSVLGGLRLAPVHASSLLEGLGATIFFRCNAP
38	Tp0791 / TPANIC_RS03920	WP_010882236.1	5	0.537771	0.022	0.338	0.038	AMP	0.86	AMP	0.709	AMP	AMP	0.867	AMP	0.9304	MIDDHEALLLLVLSSGPAALASLPLHPVLGKGYRNTPGALEEKAVRISCVRECLNVVQIGGRIPVLLTSAAELPRLGSCVR
39	Tp0070 / TPANIC_RS00340	WP_010881519.1	4	0.641414	0.131	0.446	0.116	AMP	1	AMP	0.797	NAMP	AMP	1	AMP	0.9999	MLPFYFLSVATNAAIGFILTVLDSQEESAHDCPFLYDATFSLVLALLSGIAAVCKCVNPIGAQLPVLGDLIPTLAGGTGCALFLHRYCVALSKPSPIPRTLVQYAKPLGLFSLAASILHLLFAPTLFL
40	TPANIC_RS05520	WP_013945579.1	4	0.638529	0.215	0.396	0.202	AMP	0.987	AMP	0.931	NAMP	AMP	0.997	AMP	0.7417	MIFMRRSGDFAREAVVGAVLVGVLLMGAAVFALLSPMEYGCGLGWAQDALRFLRGAAPVGGIFAGFISLLVGVANMRDRAPTRKLPERVDKGAEG
41	Tp0847 / TPANIC_RS04190	WP_014342609.1	4	0.610457	0.35	0.741	0.2	AMP	1	AMP	0.982	NAMP	AMP	1	Non-AMP	0.0002	MLNLGQVKVLEEKVAKAVHLVQMLKEENAALRAEIDGRGKRITELEQLVLAFQDDQTKIEEGILKALNHLSTFEDSAYGEALTQHAAKVLENREHAGLSEELTSRTQMEIF
42	Tp0700 / TPANIC_RS03475	WP_010882145.1	4	0.599329	0.349	0.695	0.17	AMP	1	AMP	0.9795	NAMP	AMP	1	Non-AMP	0.0018	MVMAAAPLQNLCYDGLLQVTSGGNISLPVPSNQVIYAHFEHVDATPAEQGQAGVSVSELQILDALVERLIVQRRVAAEAADMAVQKRQETLLRAAELFSQKQVDETKRRGESLPYTSVEVQGPELFDLRA
43	Tp0679 / TPANIC_RS03370	WP_010882124.1	4	0.598343	0.093	0.28	0.101	AMP	1	AMP	0.8585	NAMP	AMP	0.856	AMP	0.9999	MNEFLSLLSRAQTILLMLRLAVTAVAVFLAIVAWTKTRTQETVCFIAGVLCMYLAQLFAFLRAAGFSITRYTPVPGVSLVGFTLELLPLACFIASLIFTIKRHSI
44	Tp0874 / TPANIC_RS04310	WP_010882317.1	4	0.514371	0.055	0.53	0.102	AMP	0.995	AMP	0.927	NAMP	AMP	0.991	Non-AMP	0.0006	MKFDGLIRNLDHITRKDTYLYYREEFSAVACYSLFGRIHSGRVEFSVETTPVGEKSVQVKLVDAIDYPLLPLVQALKRVVRLLIEKNQLPR
45	Tp0992 / TPANIC_RS04885	WP_010882436.1	4	0.505729	0.125	0.3	0.184	AMP	0.969	AMP	0.9635	AMP	AMP	0.996	Non-AMP	0.0026	MKKKDAFVGTIGYDGQRAVVDRARVLKHSRSSLQELLSAGAFREAAACAVWERSTEALEAVASAYNARSGSRYSAQDIAKVFGIASEPGEKAVVL
46	Tp0066 / TPANIC_RS00320	WP_010881515.1	3	0.5981	0.109	0.385	0.244	AMP	1	AMP	0.964	NAMP	AMP	1	Non-AMP	0.4847	MQRVLESDTPYFVKGIQRPVSTLSDRDRALLNRRGNAYLNEGKLQEAARVFITTGYHDGLTRIGDVYMRKADVLTALRFYYFARNEQKMRPIVSALSVLIRCLI
47	Tp0666 / TPANIC_RS03295	WP_010882111.1	3	0.536657	0.23	0.369	0.264	AMP	0.964	AMP	0.979	NAMP	AMP	0.949	Non-AMP	0.0016	MQKGSGASSVMTLYEYYLIFPDGECREISGPPCERSLLDMNGHPLRVPLSSNRVIAYRVAGKRTVAGGRGVVGIWYTLEQLDALELLEYVSGPLGQR
48	Tp0461 / TPANIC_RS02255	WP_010881910.1	3	0.5364	0.12	0.363	0.122	AMP	1	AMP	0.982	NAMP	AMP	1	Non-AMP	0.1678	MLQAAACGAMRGGVLEYTGKMEGMGVRVERVRCEQNLSKTAFARELGIGVEELDAIERGTMPLSRDLTLLLCVVFAVNRLWLESGEGEPFSASAVSPQETVQPEEEAREPPIPPPRWRG
49	Tp0589 / TPANIC_RS02895	WP_010882035.1	3	0.519214	0.184	0.46	0.126	AMP	0.897	AMP	0.9785	NAMP	AMP	0.989	Non-AMP	0	MVVKTVRVLNRAGVHARPAALIVQAASRFDSKIMLVRDTIRVNAKSIMGVMAMAAGCGSELELVVEGPDEVAALSAIERLFQNKFEEE
50	Tp0059 / TPANIC_RS05175	WP_010881508.1	3	0.504614	0.586	0.491	0.705	NAMP	0.283	NAMP	0.2045	NAMP	NAMP	0.263	AMP	0.9998	MRKYLSARSMCCSFFSCAKNCATLGLDSTEGRQFLAVGPQPFASLEGFHGEGGDCLFTTFPPLSIPRRRFCAGHA
51	Tp0368 / TPANIC_RS01800	WP_010881816.1	3	0.477914	0.045	0.273	0.039	AMP	1	AMP	0.9855	NAMP	AMP	0.999	Non-AMP	0.0039	MRLRGVAGALLGAVVLVALGLMGVWWVFYPKKGDRGAAVAREPVLLHIDPAQMEAADEPLTLPPIERSRERMSAWSEQECLRQLEYPTEKAVQALEHANEKRIQQMLEAVP
52	Tp0676 / TPANIC_RS03350	WP_010882121.1	3	0.423743	0.022	0.08	0.049	AMP	0.982	AMP	0.985	NAMP	AMP	0.843	Non-AMP	0.0052	MRCSHNWDDPPPLFGAVSYGMQEGAGRGVRREARDTPCRGTAEGLATSQPEDGETRAALQRIDHLDTQLLQLERDLAHYLEMAELPDPFSEN
53	Tp0356 / TPANIC_RS01740	WP_013945017.1	3	0.414986	0.046	0.367	0.048	AMP	0.569	AMP	0.987	NAMP	AMP	0.887	Non-AMP	0.0009	MSAKIYVGNLNYATTEAGLASLFSQFGEVLSVAVIKDKLTQRSKGFGFVEMESAESAELVINELNEKEFEGRRLRVNYAEEKPRFPFKN
54	Tp0906 / TPANIC_RS04455	WP_010882349.1	2	0.3281	0.062	0.465	0.081	NAMP	0.372	NAMP	0.4135	AMP	AMP	0.903	Non-AMP	0.0002	MVTMEEELIAYIARALVDRPGEVTVTKSPGEGLEILQLRVASEDVGKVIGKHGRIARALRTLLSASAHASQTRYALEIID
55	Tp0825 / TPANIC_RS04080	WP_010882269.1	2	0.281114	0.371	0.538	0.691	NAMP	0.236	NAMP	0.117	NAMP	NAMP	0.006	Non-AMP	0.0088	MNSMHLHAVRYIRVRLQRMRQMAAIQRKERGGPACSRQAPGDRIRFNRRTRCLESEHRAIS
56	Tp0055 / TPANIC_RS00270	WP_010881504.1	1	0.366457	0.253	0.207	0.107	NAMP	0.45	NAMP	0.4155	NAMP	NAMP	0.14	AMP	0.9927	MNQIRLFAQSALVSVMGMGMVFAFLLLLICVVRCVGALVSSFGWDRGPDEGVGAAVPAGGALAAAIAVAVHEKARSTS
57	Tp0904 / TPANIC_RS05370	WP_010882347.1	1	0.325743	0.049	0.259	0.186	NAMP	0.45	AMP	0.696	NAMP	NAMP	0.403	Non-AMP	0.2372	MNKNTQDKGTPAALQVFLLPQYNRYSAEMTRHVPLLCNLFSMSRYVLRHLTAQIILERMSAACVCLRRRRQSEFTDPTEKIGE
58	TPANIC_RS04495	WP_013945483.1	1	0.234629	0.096	0.451	0.599	NAMP	0.297	NAMP	0.179	NAMP	NAMP	0.02	Non-AMP	0.0004	MKGSVFPSRGRRSSRRVFCSETIHELEKKIQDQSYIEGAIQRLALILSKRLLSMRGIECD
59	Tp0320 / TPANIC_RS05480	WP_014505460.1	1	0.218914	0.186	0.07	0.213	NAMP	0.05	NAMP	0.0215	NAMP	NAMP	0.017	AMP	0.9749	MPARGRPSSSSDFCLYGMAVVNGFCVQDIPYGSRVVLPGRMRSSSAGA
60	Tp0021 / TPANIC_RS00105	WP_010881470.1	1	0.191657	0.021	0.166	0.017	NAMP	0.15	AMP	0.9235	NAMP	NAMP	0.063	Non-AMP	0.0011	MDDARYAEWSASLVQLPDTHFFDLMRLYLGVLKTPFHKQRLVQQLSAFLQRKSIQNAVVQMLDELDLLFISVVMCVPRATLELLTIFF
61	Tp0777 / TPANIC_RS03855	WP_010882222.1	0	0.253514	0.248	0.364	0.234	NAMP	0.416	NAMP	0.1525	NAMP	NAMP	0.019	Non-AMP	0.3411	MKTLQCDICRKEVDNSLPERLYWTFREYDVCEDCKESIEDKLRPIIRTHQPYSQGWYENQFMGMVQRGVSNRRP
62	Tp0535 / TPANIC_RS02625	WP_010881982.1	0	0.168243	0.113	0.136	0.057	NAMP	0.466	NAMP	0.2275	NAMP	NAMP	0.175	Non-AMP	0.0032	MRESAEAAGETLVKEAEGSVVEAQEQAWHEACARIDAQRREACGQLERELSVLEEDVERFEAFLDGFFFG
63	Tp0084 / TPANIC_RS00410	WP_010881533.1	0	0.132329	0.064	0.159	0.026	NAMP	0.119	NAMP	0.377	NAMP	NAMP	0.181	Non-AMP	0.0003	MVVNAVVGADEASARLREYCSGLPDVEKKIAESTSPEGAKLVSDFGIGSVPMVVILDEDSSELFRTADIGELEKFFS
64	Tp0539 / TPANIC_RS05310	WP_010881986.1	0	0.110543	0.03	0.16	0.024	NAMP	0.088	NAMP	0.318	NAMP	NAMP	0.076	Non-AMP	0.0778	MTSLQVLSIISSFLTQGLPHPPHVAADSHYISKKDSISASVGRLTSLLPCLCALHAYGVGHRPFVIVDIFYAE
65	Tp0490 / TPANIC_RS02390	WP_010881939.1	0	0.103829	0.063	0.078	0.047	NAMP	0.418	NAMP	0.103	NAMP	NAMP	0.016	Non-AMP	0.0018	MSEEERMYSFSGEEIKELALLFRRCGQTLAPALRRLALFVDRTVCRHMTVEEAEDFFGSAER
66	TPANIC_RS05470	WP_175393427.1	0	0.0916429	0.03	0.143	0.046	NAMP	0.026	NAMP	0.0075	NAMP	NAMP	0.002	Non-AMP	0.387	MQLGVQHYFSAHWGIDATATVSFGIDTKLAKFRIPYTLRFGPVFRT
67	Tp0039 / TPANIC_RS00195	WP_014342241.1	0	0.0707429	0.039	0.314	0.076	NAMP	0.054	NAMP	0.0095	NAMP	NAMP	0.002	Non-AMP	0.0007	MARTAASVRQENKPCQQFYFVLDEKALQSPLRENPSKNVRTIPDAGDENSSFGHARVIA
68	Tp0451 / TPANIC_RS05285	WP_010881899.1	0	0.0553714	0.063	0.152	0.092	NAMP	0.007	NAMP	0.002	NAMP	NAMP	0.001	Non-AMP	0.0706	MLSMQLVTVTVQGAMVADIAVAVRTAPHPFLYASVLQDSPQARKPVRETRYQKMSAFLCT
			8/8: 8/68					NAMP = Non-AMP
			7/8: 14/68
			6/8: 11/68
			5/8: 5/68
			4/8: 7/68
			3/8: 8/68
			2/8: 2/68
			1/8: 5/68
			0/8: 8/68
